# Supplementary material for: The First Two Complete Mitochondrial Genomes for the Subfamily Meligethinae (Coleoptera: Nitidulidae) and Implications for the Higher Phylogeny of Nitidulidae
Source: MDPI journal article supplement (doi:10.3390/insects15010057), 2024-01-12
Supplement: s1 [file s1]

**Table S2.** The best model and optimal partitioning strategy selected for the four datasets of ML analysis by ModelFinder.

| Dataset | Optimal Partition | Subset Partitions                                                      | Best Model  |
|---------|-------------------|------------------------------------------------------------------------|-------------|
| PCG12   | Partition1        | <i>atp6, cox1, cox2, cox3</i>                                          | GTR+F+R4    |
|         | Partition2        | <i>atp8, nad2, nad3</i>                                                | GTR+F+I+G4  |
|         | Partition3        | <i>cytb</i>                                                            | GTR+F+I+G4  |
|         | Partition4        | <i>nad1, nad4L, nad4, nad5</i>                                         | GTR+F+I+G4  |
|         | Partition5        | <i>nad6</i>                                                            | TIM+F+G4    |
| PCG123  | Partition1        | <i>atp6_codon1, cox1_codon1, cox2_codon1, cox3_codon1, cytb_codon1</i> | GTR+F+R3    |
|         | Partition2        | <i>atp6_codon2, cox1_codon2, cox2_codon2, cox3_codon2, cytb_codon2</i> | TVM+F+I+G4  |
|         | Partition3        | <i>atp6_codon3</i>                                                     | HKY+F+G4    |
|         | Partition4        | <i>atp8_codon1, nad2_codon1, nad3_codon1</i>                           | TIM2+F+I+G4 |
|         | Partition5        | <i>atp8_codon2, nad2_codon2, nad3_codon2, nad6_codon2</i>              | TVM+F+G4    |
|         | Partition6        | <i>atp8_codon3</i>                                                     | TPM2u+F+R2  |
|         | Partition7        | <i>cox1_codon3, cox2_codon3</i>                                        | HKY+F+R3    |
|         | Partition8        | <i>cox3_codon3</i>                                                     | TIM2+F+G4   |
|         | Partition9        | <i>cytb_codon3</i>                                                     | TN+F+G4     |
|         | Partition10       | <i>nad1_codon1, nad4L_codon1, nad4_codon1, nad5_codon1</i>             | TVM+F+I+G4  |
|         | Partition11       | <i>nad1_codon2, nad4L_codon2, nad4_codon2, nad5_codon2</i>             | GTR+F+I+G4  |
|         | Partition12       | <i>nad1_codon3, nad4_codon3</i>                                        | TVM+F+R3    |
|         | Partition13       | <i>nad2_codon3</i>                                                     | TN+F+G4     |
|         | Partition14       | <i>nad3_codon3</i>                                                     | TPM2+F+R2   |
|         | Partition15       | <i>nad4L_codon3</i>                                                    | HKY+F+R2    |
|         | Partition16       | <i>nad5_codon3</i>                                                     | TPM3+F+R3   |
|         | Partition17       | <i>nad6_codon1</i>                                                     | TIM2+F+I+G4 |
|         | Partition18       | <i>nad6_codon3</i>                                                     | HKY+F+G4    |
| PCG12R  | Partition1        | <i>atp6, cox1, cox2, cox3</i>                                          | GTR+F+R4    |
|         | Partition2        | <i>atp8, cytb, nad3</i>                                                | GTR+F+I+G4  |
|         | Partition3        | <i>nad1</i>                                                            | GTR+F+I+G4  |
|         | Partition4        | <i>nad2</i>                                                            | GTR+F+I+G4  |
|         | Partition5        | <i>nad4L, nad4, nad5</i>                                               | GTR+F+I+G4  |
|         | Partition6        | <i>nad6</i>                                                            | GTR+F+I+G4  |
|         | Partition7        | <i>rrnL, rrnS</i>                                                      | GTR+F+I+G4  |
| PCG123R | Partition1        | <i>atp6_codon1, cox1_codon1, cox2_codon1, cox3_codon1, cytb_codon1</i> | GTR+F+R3    |
|         | Partition2        | <i>atp6_codon2, cox1_codon2, cox2_codon2, cox3_codon2, cytb_codon2</i> | TVM+F+I+G4  |
|         | Partition3        | <i>atp6_codon3</i>                                                     | HKY+F+G4    |

|             |                                                                  |             |
|-------------|------------------------------------------------------------------|-------------|
| Partition4  | <i>atp8_codon1, nad2_codon1, nad3_codon1</i>                     | TIM2+F+I+G4 |
| Partition5  | <i>atp8_codon2, nad2_codon2, nad3_codon2, nad6_codon2</i>        | TVM+F+G4    |
| Partition6  | <i>atp8_codon3</i>                                               | TPM2u+F+R2  |
| Partition7  | <i>cox1_codon3</i>                                               | HKY+F+R3    |
| Partition8  | <i>cox2_codon3</i>                                               | HKY+F+R2    |
| Partition9  | <i>cox3_codon3</i>                                               | TN+F+G4     |
| Partition10 | <i>cytb_codon3</i>                                               | TN+F+G4     |
| Partition11 | <i>nad1_codon1, nad4L_codon1, nad4_codon1, nad5_codon1, rrnS</i> | TVM+F+I+G4  |
| Partition12 | <i>nad1_codon2, nad4L_codon2, nad4_codon2, nad5_codon2</i>       | GTR+F+I+G4  |
| Partition13 | <i>nad1_codon3, nad4_codon3</i>                                  | TPM3u+F+R3  |
| Partition14 | <i>nad2_codon3</i>                                               | TN+F+G4     |
| Partition15 | <i>nad3_codon3</i>                                               | TPM2u+F+R2  |
| Partition16 | <i>nad4L_codon3</i>                                              | HKY+F+R2    |
| Partition17 | <i>nad5_codon3</i>                                               | TPM3+F+R3   |
| Partition18 | <i>nad6_codon1</i>                                               | TIM2+F+I+G4 |
| Partition19 | <i>nad6_codon3</i>                                               | HKY+F+G4    |
| Partition20 | <i>rrnL</i>                                                      | GTR+F+I+G4  |
